# Supplementary material
Source: Springer Nature journal article supplement (https://www.springermedizin.de/resource/supplementary/12937_2010_312_MOESM1_ESM.pdf/25654844)
Supplement: MOESM1 [file 25654844]

Neighborhood houses visited, screened for children aged 0-5 who were underweight for their age.  
At least one child weighing more than 2 standard deviations below weight-for-age norm  
(n=788)

Randomized to intervention  
(n=536)

Did not receive any follow-up weighings  
(n=32)  
Child died during course of study  
(n=16)

Included in survival analysis models  
(n=536)  
(Children not weighed censored at 12 months; children who died censored at death)

Randomized to control  
(n=252)

Did not receive any follow-up weighings  
(n=50)  
Child died during course of study  
(n=5)

Included in survival analysis models  
(n=252)  
(Children not weighed censored at 12 months; children who died censored at death)
